# Supplementary material for: Phenotypic plasticity as a mechanism of cave colonization and adaptation
Source: eLife. 2020 Apr 21;9:e51830. doi: 10.7554/eLife.51830 (PMC7173965; doi:10.7554/eLife.51830)
Supplement: Figure 1—source data 1. [file elife-51830-fig1-data1.xlsx]

## Sheet: 1B
Eye size normalized by body length in surface fish (SF) kept in constant dark (D/D) vs. light/dark (L/D) photoperiod for 1 to 2 years.
	eye length/total fish length	SF L/D	SF D/D
	Sample 1	0.0841096	0.106352
	Sample 2	0.0890279	0.0956959
	Sample 3	0.0864445	0.0951964
	Sample 4	0.0832431	0.0897104
	Sample 5	0.0911745	0.0906771
	Sample 6	0.0917303	0.0897281
	Sample 7	0.0875114	0.0893706
	Sample 8	0.0858824	0.0913437
	AVG	0.0873905	0.0935093
	ST DEV	0.00309339	0.00574621

## Sheet: 1C
Number of melanophores in 1 year-old Surface fish (SF) kept in constant dark (D/D) vs. light/dark (L/D) photoperiod determined in 4 different body regions.
	MELANOPHORE COUNT
	Tail fin stripe	Sample 1	Sample 2	Sample 3	Sample 4	Sample 5			Mean	StDev
	D/D	85	62	160	103	176			117.2	48.9255
	L/D	114	124	113	130	148			125.8	14.2899
	Below dorsal fin
	D/D	50	50	64	51	70	68		58.8333	9.38083
	L/D	46	45	37	44	34			41.2	5.35724
	Flank of trunk
	D/D	89	115	72	73	78			85.4	17.869
	L/D	42	45	45	47	43			44.4	1.94936
	Chin
	D/D	26	41	29	33	32			32.2	5.63028
	L/D	28	23	31	26	32			28	3.67423

## Sheet: 1D
Thickness of retinal layers in Surface fish (SF) kept in constant dark (D/D) vs. light/dark (L/D) photoperiod.
THICKNESS OF RETINAL LAYERS
GCL, ganglion cell layer; IPL, inner plexiform layer; INL, inner nuclear layer; OPL, outer plexiform layer; ONL, outer nuclear layer; PCL photoreceptor cell layer; RPE, retinal pigment epithelium
													Animal1 L/D
Surface fish (SF) kept in light/dark (L/D) N=3	total (µm)	GCL (µm)	IPL (µm)	INL (µm)	OPL (µm)	ONL (µm)	PCL (µm)	RPE (µm)		Eye diameter (µm)			SUMMARY	total (µm)	GCL (µm)	IPL (µm)	INL (µm)	OPL (µm)	ONL (µm)	PCL (µm)	RPE (µm)
Animal1	196.109	28.9969	24.3783	29.5368	12.0629	21.5605	17.5691	56.2942		measurment1	2915.26		st dev	37.1213	7.73497	5.25582	5.41185	4.12267	7.58644	6.72984	11.7572
retina measurement 1	186.811	30.5897	21.6999	25.4552	12.6463	24.8114	16.7798	46.6442		measurment2	2896.6		average	181.352	20.7198	21.2975	26.4221	14.1938	22.272	19.4558	46.5766
retina measurement 2	132.495	13.4933	21.5111	17.9911	7.2593	19.7666	24.0605	30.1213		measurment3	2935.47		norm data	6.21626	0.710219	0.730019	0.905675	0.486523	0.763423	0.666892	1.59652
retina measurement 3	212.431	33.3602	23.1643	34.4007	18.1565	19.7168	16.2514	58.602		measurment4	2946.86
retina measurement 4	189.153	27.6049	20.9254	27.7356	13.6823	22.4104	15.5985	49.9158		measurment5	2892.75
retina measurement 5	175.25	12.0276	28.5624	23.3697	8.8305	29.3333	20.0459	39.9366
retina measurement 6	192.69	19.0259	15.9171	33.634	14.1778	17.1129	28.4229	51.2576
retina measurement 7	184.311	21.6067	21.9524	29.598	11.2471	21.0903	19.0259	51.2576
retina measurement 8	157.106	11.774	18.5922	19.6652	15.009	18.0591	16.4796	39.3221
retina measurement 9	199.715	26.0411	24.7517	28.3144	14.4409	25.2536	14.6687	54.7081
retina measurement 10	135.136	15.9621	14.3724	22.2968	13.3642	16.4941	9.35619	27.6611
retina measurement 11	119.938	9.29443	11.618	21.3734	11.0606	11.618	9.46292	25.6651
retina measurement 12	178.12	13.522	19.3173	21.6895	18.4438	20.3418	24.2049	51.8879
retina measurement 13	187.036	22.9153	20.2107	26.0594	20.8853	21.2231	26.8422	49.3996
retina measurement 14	273.983	24.5834	32.489	35.211	21.6399	45.2882	33.0687	65.9765
retina measurement 15										Eye diameter (µm)			Animal2 L/D
Animal2	186.675	15.1674	25.8161	22.6843	17.1212	27.1501	22.0231	49.1171		measurment1	2775.74		SUMMARY	total (µm)	GCL (µm)	IPL (µm)	INL (µm)	OPL (µm)	ONL (µm)	PCL (µm)	RPE (µm)
retina measurement 1	148.602	16.7282	18.4787	21.2622	20.6335	23.5457	18.8317	26.6864		measurment2	2837.43		st dev	32.3631	7.73522	5.80727	7.49276	4.96336	3.56705	4.53813	12.7155
retina measurement 2	121.209	10.7711	11.4755	21.9419	6.84693	18.1878	11.9036	34.1229		measurment3	2741.21		average	179.541	19.8128	21.9294	29.4244	11.3047	24.4152	17.1039	45.6473
retina measurement 3	167.174	11.1575	17.7255	33.0086	13.2707	30.3205	15.6228	42.6255		measurment4	2923.68		norm data	6.3803	0.704081	0.779297	1.04564	0.401733	0.867635	0.607815	1.62215
retina measurement 4	164.794	8.27509	18.6525	30.1218	17.6961	24.8306	13.1943	44.1977		measurment5	2791.91
retina measurement 5	207.83	32.6215	27.4286	32.8147	10.5799	23.2077	20.3508	51.6728
retina measurement 6	159.526	19.7752	15.8355	21.1664	10.2189	22.3393	23.9938	44.7679
retina measurement 7	167.436	26.9172	27.0446	31.0303	4.872	18.3457	14.0215	23.2177
retina measurement 8	206.468	21.4986	23.0402	34.54	9.69096	25.3884	18.7963	56.6734
retina measurement 9	241.848	28.5761	27.8906	45.7241	11.0015	26.2319	19.8897	67.1106
retina measurement 10	175.642	19.8868	19.4736	23.8283	6.47874	27.1909	8.41563	51.7901
retina measurement 11	207.292	26.3788	30.2911	34.9699	7.24653	26.2437	18.2033	55.7849
retina measurement 12										Eye diameter (µm)			Animal3 L/D
Animal3	192.64	23.5101	32.9878	28.7066	15.5372	30.8602	24.9804	36.1078		measurment1	2927.6		SUMMARY	total (µm)	GCL (µm)	IPL (µm)	INL (µm)	OPL (µm)	ONL (µm)	PCL (µm)	RPE (µm)
retina measurement 1	118.172	6.58291	16.9794	14.2917	4.15344	16.2463	15.6425	35.7118		measurment2	2908.17		st dev	38.2088	8.6084	8.24202	5.68697	4.84014	5.60179	3.62595	13.9242
retina measurement 2	182.87	13.7854	35.4082	24.9096	8.52417	27.7964	24.0584	40.5066		measurment3	2896.54		average	179.863	17.5099	28.3221	22.4092	12.8866	24.4228	20.241	47.676
retina measurement 3	208.47	13.8291	32.4578	19.7131	15.4916	25.51	18.0797	63.4506		measurment4	2778.8		norm data	6.25007	0.608451	0.984164	0.778699	0.447798	0.848668	0.703355	1.6567
retina measurement 4	213.155	29.1771	29.4631	22.9757	17.4187	23.5086	20.5669	65.9568
retina measurement 5	193.248	20.3838	29.2637	27.7803	12.2516	20.5321	23.6402	44.1292
retina measurement 6	142.053	12.983	28.629	20.8639	16.3452	15.0989	18.0833	24.0028
retina measurement 7	116.307	5.46594	14.222	13.4244	9.95042	19.9548	16.0684	37.9858
retina measurement 8	121.561	5.73609	15.7877	17.169	10.0834	18.2059	15.5259	33.0314
retina measurement 9	157.74	7.78116	20.2393	17.8132	9.39695	29.6506	19.6214	51.1673
retina measurement 10	180.34	18.8812	31.102	32.2581	7.21097	26.333	23.0211	38.9398
retina measurement 11	248.116	29.5503	43.4871	32.5518	21.6385	35.9524	25.6023	57.9589
retina measurement 12	191.721	21.695	23.8405	19.2429	14.9831	24.4102	15.7301	67.8874
retina measurement 13	211.902	23.8583	24.4136	21.4122	17.4356	28.9052	18.1168	67.088
retina measurement 14	203.659	30.0935	40.8639	24.475	16.1869	21.5694	22.7544	47.8624
retina measurement 15	213.155	29.1771	29.4631	22.9757	17.4187	23.5086	20.5669	65.9568
retina measurement 16	208.47	13.8291	32.4578	19.7131	15.4916	25.51	18.0797	63.4506
retina measurement 17	182.87	13.7854	35.4082	24.9096	8.52417	27.7964	24.0584	40.5066
retina measurement 18	118.172	6.58291	16.9794	14.2917	4.15344	16.2463	15.6425	35.7118
retina measurement 19	192.64	23.5101	32.9878	28.7066	15.5372	30.8602	24.9804	36.1078
retina measurement 20
Surface fish (SF) kept in constant dark (D/D) N=4	total (µm)	GCL (µm)	IPL (µm)	INL (µm)	OPL (µm)	ONL (µm)	PCL (µm)	RPE (µm)		Eye diameter (µm)			Animal1 D/D
Animal1	124.837	8.25736	15.0059	18.5516	10.0004	20.5658	25.2679	26.5685		measurment1	2567.57		SUMMARY	total (µm)	GCL (µm)	IPL (µm)	INL (µm)	OPL (µm)	ONL (µm)	PCL (µm)	RPE (µm)
retina measurement 1	182.381	13.2565	18.4956	23.7426	10.7805	23.2338	30.1659	51.9104		measurment2	2592.17		st dev	44.9875	7.35961	5.39792	6.94124	3.37285	6.43608	5.95096	11.9262
retina measurement 2	246.12	32.9574	24.4444	41.4151	12.4499	36.7684	23.4425	53.2401		measurment3	2640.59		average	139.648	11.5654	15.2015	21.6702	8.04109	21.672	18.8929	36.1093
retina measurement 3	126.412	11.5304	14.9191	17.6271	12.7135	17.3624	15.8964	34.2536		measurment4	2552.82		norm data	5.56168	0.460609	0.605422	0.863049	0.320248	0.86312	0.752437	1.43811
retina measurement 4	85.5992	6.45037	7.21173	18.6687	2.91003	12.8799	10.1869	22.3557		measurment5	2541.35
retina measurement 5	191.365	24.3771	21.662	29.4167	12.974	27.0727	23.7313	42.4412		measurment6	2392.1
retina measurement 6	161.02	8.60444	17.2494	24.2469	5.88905	28.8647	20.3274	46.0457		measurment7	2289.65
retina measurement 7	161.46	11.4488	10.3997	24.2436	10.1579	27.0692	25.2371	48.1201
retina measurement 8	135.447	7.99933	22.8925	20.5888	5.96604	21.611	19.3132	34.0572
retina measurement 9	152.194	7.19574	17.6929	22.913	8.20998	23.611	19.4248	46.3698
retina measurement 10	122.232	7.44195	16.6059	15.5246	8.08447	18.6049	17.0376	33.2998
retina measurement 11	138.857	8.7696	12.9279	21.2175	7.03447	21.8359	17.7484	41.5507
retina measurement 12	93.1162	8.98034	9.35553	17.495	5.97703	14.8413	13.4559	21.0496
retina measurement 13	90.5129	8.62419	11.6799	17.5969	3.43587	14.0743	11.0408	19.5947
retina measurement 14	83.1642	7.58748	7.47997	11.8055	4.03328	16.6848	11.1174	20.7824
retina measurement 15										Eye diameter (µm)			Animal2 D/D
Animal2	106.503	8.159	16.318	16.7029	5.24718	18.8541	14.6288	22.7255		measurment1	2476.34		SUMMARY	total (µm)	GCL (µm)	IPL (µm)	INL (µm)	OPL (µm)	ONL (µm)	PCL (µm)	RPE (µm)
retina measurement 1	115.371	6.87782	19.6767	17.4077	5.80619	23.0019	15.0406	23.3204		measurment2	2461.36		st dev	37.1463	5.50581	5.25146	5.54827	3.1108	5.34475	6.39842	15.5819
retina measurement 2	166.873	12.5607	16.5173	28.99	6.54015	26.6963	36.3673	30.755		measurment3	2684.14		average	172.122	14.1915	21.0325	26.8052	8.50218	29.0001	19.1436	46.5796
retina measurement 3	114.641	9.29024	13.1581	23.0054	3.97687	20.7314	13.3401	30.4872		measurment4	2670.84		norm data	6.66105	0.549204	0.813949	1.03735	0.329031	1.12229	0.74085	1.80261
retina measurement 4	199.306	13.4988	21.3103	25.9922	8.41291	35.3762	17.1794	63.2837		measurment5	2627.35
retina measurement 5	174.118	13.3116	18.059	26.2459	6.89954	30.165	21.7142	51.7742
retina measurement 6	199.483	16.1119	24.0319	25.9252	8.10247	34.3741	16.6515	65.024
retina measurement 7	201.219	23.6708	23.4578	33.5753	11.9353	31.1089	19.3606	54.1697
retina measurement 8	217.263	26.357	28.5456	31.593	12.4858	30.0498	17.2848	60.5201
retina measurement 9	187.599	14.8656	30.7278	27.1977	13.2889	27.4848	15.7414	51.0722
retina measurement 10	166.137	13.0222	14.8007	29.6566	5.79782	32.5348	27.9655	36.158
retina measurement 11	199.223	12.5835	23.6291	35.7967	11.5924	32.3702	18.0459	58.7303
retina measurement 12	189.85	14.1799	23.19	26.3785	10.4427	34.2545	15.5467	57.5146
retina measurement 13										Eye diameter (µm)			Animal3 D/D
Animal3	177.189	14.2458	18.959	21.9308	13.4382	26.9225	15.5541	54.4497		measurment1	2016.12		SUMMARY	total (µm)	GCL (µm)	IPL (µm)	INL (µm)	OPL (µm)	ONL (µm)	PCL (µm)	RPE (µm)
retina measurement 1	104.18	11.5941	17.9345	19.6383	3.68715	12.7438	13.1574	21.3558		measurment2	2092.85		st dev	51.1865	5.31335	3.62796	9.467	4.31998	7.30645	6.54272	18.0909
retina measurement 2	202.188	19.9918	17.9958	40.5784	13.8953	30.2578	27.4674	45.3884		measurment3	2030.64		average	154.063	14.0879	16.671	27.0192	9.49823	21.4791	19.4808	40.3663
retina measurement 3	202.66	16.4953	20.5888	33.8977	8.24154	28.0293	19.8594	68.0324		measurment4	2083.78		norm data	7.58394	0.693498	0.820654	1.33006	0.467563	1.05734	0.95897	1.98708
retina measurement 4	104.242	7.87709	14.1551	19.67	6.24819	12.2429	14.8865	26.8235		measurment5	2013.9
retina measurement 5	219.781	21.0004	20.6877	34.1673	13.2093	28.7116	23.8734	72.291		measurment6	1951.3
retina measurement 6	84.8021	8.7425	8.06203	15.4928	3.99574	11.8241	10.0298	20.1025
retina measurement 7	73.08	7.89619	8.02032	10.9038	3.06315	11.497	11.6117	20.5988
retina measurement 8	112.02	7.1092	15.5241	19.8051	7.70348	20.4251	17.2392	26.6081
retina measurement 9	145.286	13.1973	17.9688	27.4485	9.15243	24.6182	22.9444	26.9897
retina measurement 10	199.406	21.0974	17.2857	36.5274	12.6387	15.1415	31.5711	51.6843
retina measurement 11	203.554	20.9125	18.6525	35.742	16.744	22.4433	27.8313	50.1847
retina measurement 12	96.1649	11.1527	14.7182	19.0083	3.3633	15.2229	12.0388	18.9016
retina measurement 13	114.172	7.75689	16.5022	21.8995	9.36746	20.3121	16.8363	23.4661
retina measurement 14	104.242	7.87709	14.1551	19.67	6.24819	12.2429	14.8865	26.8235
retina measurement 15	202.66	16.4953	20.5888	33.8977	8.24154	28.0293	19.8594	68.0324
retina measurement 16	202.188	19.9918	17.9958	40.5784	13.8953	30.2578	27.4674	45.3884
retina measurement 17	202.188	19.9918	17.9958	40.5784	13.8953	30.2578	27.4674	45.3884
retina measurement 18	177.189	14.2458	18.959	21.9308	13.4382	26.9225	15.5541	54.4497
retina measurement 19										Eye diameter (µm)			Animal4 D/D
Animal4	178.71	13.9929	17.1297	29.4441	7.91115	24.6692	27.9322	44.5657		measurment1	2705.66		SUMMARY	total (µm)	GCL (µm)	IPL (µm)	INL (µm)	OPL (µm)	ONL (µm)	PCL (µm)	RPE (µm)
retina measurement 1	175.815	12.059	15.2171	32.3891	7.12436	20.003	31.6164	50.1847		measurment2	2590.67		st dev	19.6396	1.52377	2.3157	3.78569	1.33279	3.86699	4.9211	10.8763
retina measurement 2	194.353	14.0318	15.0295	31.2669	7.87751	26.5319	32.3197	59.136		measurment3	2293.23		average	182.033	13.212	16.9375	29.0378	8.67501	26.4618	30.1588	56.6648
retina measurement 3	195.094	12.2539	18.1307	34.1471	10.3707	27.8231	27.4822	60.3435		measurment4	2475.92		norm data	7.56334	0.548947	0.703741	1.2065	0.36044	1.09947	1.25307	2.35438
retina measurement 4	197.396	10.4499	19.1225	29.6384	8.21443	31.5586	30.6348	61.2469		measurment5	1968.44
retina measurement 5	132.276	13.6486	10.576	22.4299	8.42691	19.0345	21.9344	30.2933
retina measurement 6	149.014	11.2327	13.4594	25.0618	7.52552	19.4268	32.5333	35.726
retina measurement 7	176.908	11.7255	15.0921	34.5673	10.6399	25.6877	16.2938	58.8758
retina measurement 8	179.255	10.1379	15.6518	25.6602	10.5983	24.2661	27.4135	61.7242
retina measurement 9	177.82	14.639	16.0268	29.0458	7.19967	26.4762	29.9608	47.3213
retina measurement 10	182.033	13.212	16.9375	29.0378	8.67501	26.4618	30.1588	56.6648
retina measurement 11													norm data
													SUMMARY FOR GRAPH
														GCL	IPL	INL	OPL	ONL	PCL	RPE
													D/D (N=4)	0.563065	0.735941	1.10924	0.369321	1.03555	0.926333	1.89554
													L/D (N=3)	0.67425	0.83116	0.910006	0.445351	0.826575	0.659354	1.62512
													sd L/D	0.057066	0.134777	0.133526	0.0424478	0.0555074	0.0482137	0.0301984
													sd D/D	0.0964391	0.102198	0.203305	0.0677294	0.118063	0.23977	0.381573
