# Supplementary material for: Phenotypic plasticity as a mechanism of cave colonization and adaptation
Source: eLife. 2020 Apr 21;9:e51830. doi: 10.7554/eLife.51830 (PMC7173965; doi:10.7554/eLife.51830)
Supplement: Figure 4—source data 1. [file elife-51830-fig4-data1.xlsx]

## Sheet: Sheet1
Percent survival of Astyanax mexicanus surface fish (SF) and Pachón cavefish (PA) raised in complete darkness (D/D) or a normal photoperiod (L/D) exposed to starvation.
	Group	Day	Survival
	PA D/D	8	1
	PA D/D	9	1
	PA D/D	9	1
	PA D/D	10	1
	PA D/D	10	0.861111
	PA D/D	11	0.861111
	PA D/D	11	0.861111
	PA D/D	12	0.861111
	PA D/D	12	0.833333
	PA D/D	13	0.833333
	PA D/D	13	0.833333
	PA D/D	14	0.833333
	PA D/D	14	0.805556
	PA D/D	15	0.805556
	PA D/D	15	0.805556
	PA D/D	16	0.805556
	PA D/D	16	0.805556
	PA D/D	17	0.805556
	PA D/D	17	0.805556
	PA D/D	18	0.805556
	PA D/D	18	0.222222
	PA L/D	8	1
	PA L/D	9	1
	PA L/D	9	1
	PA L/D	10	1
	PA L/D	10	1
	PA L/D	11	1
	PA L/D	11	0.972222
	PA L/D	12	0.972222
	PA L/D	12	0.777778
	PA L/D	13	0.777778
	PA L/D	13	0.666667
	PA L/D	14	0.666667
	PA L/D	14	0.5
	PA L/D	15	0.5
	PA L/D	15	0.5
	PA L/D	16	0.5
	PA L/D	16	0.388889
	PA L/D	17	0.388889
	PA L/D	17	0.166667
	PA L/D	18	0.166667
	PA L/D	18	0
	SF D/D	8	1
	SF D/D	9	1
	SF D/D	9	1
	SF D/D	10	1
	SF D/D	10	0.972222
	SF D/D	11	0.972222
	SF D/D	11	0.972222
	SF D/D	12	0.972222
	SF D/D	12	0.972222
	SF D/D	13	0.972222
	SF D/D	13	0.944444
	SF D/D	14	0.944444
	SF D/D	14	0.833333
	SF D/D	15	0.833333
	SF D/D	15	0.722222
	SF D/D	16	0.722222
	SF D/D	16	0.5
	SF D/D	17	0.5
	SF D/D	17	0.333333
	SF D/D	18	0.333333
	SF D/D	18	0.0555556
	SF L/D	8	1
	SF L/D	9	1
	SF L/D	9	1
	SF L/D	10	1
	SF L/D	10	0.944444
	SF L/D	11	0.944444
	SF L/D	11	0.888889
	SF L/D	12	0.888889
	SF L/D	12	0.611111
	SF L/D	13	0.611111
	SF L/D	13	0.527778
	SF L/D	14	0.527778
	SF L/D	14	0.416667
	SF L/D	15	0.416667
	SF L/D	15	0.194444
	SF L/D	16	0.194444
	SF L/D	16	0.138889
	SF L/D	17	0.138889
	SF L/D	17	0.0833333
	SF L/D	18	0.0833333
	SF L/D	18	0
