# Supplementary material for: Phenotypic plasticity as a mechanism of cave colonization and adaptation
Source: eLife. 2020 Apr 21;9:e51830. doi: 10.7554/eLife.51830 (PMC7173965; doi:10.7554/eLife.51830)
Supplement: Figure 5—source data 1. [file elife-51830-fig5-data1.xlsx]

## Sheet: Sheet1
Average oxygen consumption at 2.5 and 7.5 dpf in Astyanax surface fish (SF) and Pachón cavefish (PA) raised in complete darkness (D/D) or a normal photoperiod (L/D).
	2,5 dpf larvae
	SF L/D	SF D/D	PA L/D	PA D/D		Descriptive statistics							Tukey HSD results
Sample 1	2.90372	4.90616	1.5852	4.89522
Sample 2	2.50477	5.97738	2.77703	6.24024		Treatment →	SF L/D	SF D/D	PA L/D	PA D/D	Pooled Total		treatments	Tukey HSD	Tukey HSD	Tukey HSD
Sample 3	3.1222	5.66705	3.98522	5.74616		observations N	17	15	15	16	63		pair	Q statistic	p-value	inferfence
Sample 4	1.92579	5.71136	1.71577	6.63442		sum ∑xi∑xi	401228	792051	420474	936479	2550231		A vs B	142404	0.0010053	** p<0.01
Sample 5	1.3054	5.19474	2.46518	6.19483		mean x¯x¯	23602	52803	28032	58530	40480		A vs C	21603	0.4292900	insignificant
Sample 6	3.24998	4.68982	3.5724	6.0169		sum of squares ∑x2i∑xi2	1026562	4238938	1342557	5576472	1,218.4528		A vs D	173230	0.0010053	** p<0.01
Sample 7	3.15745	4.57718	3.04911	5.89864		sample variance s2s2	0.4975	0.4046	11707	0.6351	30020		B vs C	117194	0.0010053	** p<0.01
Sample 8	2.47828	4.63488	3.20487	7.19449		sample std. dev. ss	0.7053	0.6361	10820	0.7969	17326		B vs D	27526	0.2203617	insignificant
Sample 9	1.40449	5.01152	1.48941	6.80414		std. dev. of mean SEx¯SEx¯	0.1711	0.1642	0.2794	0.1992	0.2183		C vs D	146595	0.0010053	** p<0.01
Sample 10	3.05672	5.06388	3.50661	5.15437
Sample 11	1.64051	6.76377	3.55054	5.99394
Sample 12	2.15314	4.94696	1.02378	5.03958
Sample 13	2.19017	6.11124	4.36433	4.60496
Sample 14	2.39337	5.22733	1.65333	4.5258
Sample 15	1.95189	4.72182	4.10459	6.34618
Sample 16	3.38257			6.35807
Sample 17	1.30232
	7,5 dpf larvae					Descriptive statistics							Tukey HSD results
	SF L/D	SF D/D	PA L/D	PA D/D
Sample 1	4.70809	2.39988	4.0369	4.78944		Treatment →	SF L/D	SF D/D	PA L/D	PA D/D	Pooled Total		treatments	Tukey HSD	Tukey HSD	Tukey HSD
Sample 2	3.27016	2.23484	2.05494	3.11428		observations N	20	1900-01-24	18	22	84		pair	Q statistic	p-value	inferfence
Sample 3	5.29929	3.16186	4.28514	3.81677		sum ∑xi∑xi	861263	4040-06-20	60.7386	73.341	2983851		A vs B	54660	0.0012646	** p<0.01
Sample 4	4.76754	3.28426	2.51818	2.43681		mean x¯x¯	43063	2575-03-01	3.3744	3.3337	35522		A vs C	45260	0.0104122	* p<0.05
Sample 5	3.37199	4.20049	2.69528	2.33058		sum of squares ∑x2i∑xi2	3926180	9121-09-28	214.652	268.232	1,139.2705		A vs D	49672	0.0040145	** p<0.01
Sample 6	3.53646	2.96784	3.50333	4.74171		sample variance s2s2	11437	0.3958	0.5705	1.1303	0.9560		B vs C	0.5915	0.8999947	insignificant
Sample 7	3.63396	3.48691	3.69225	3.54934		sample std. dev. ss	10695	0.6291	0.7553	1.0632	0.9777		B vs D	0.4074	0.8999947	insignificant
Sample 8	6.26546	3.00482	2.89345	3.46179		std. dev. of mean SEx¯SEx¯	0.2391	0.1284	0.178	0.2267	0.1067		C vs D	0.2020	0.8999947	insignificant
Sample 9	2.57418	2.87515	3.39426	4.68754
Sample 10	5.07757	3.55345	2.87299	4.19372
Sample 11	5.61452	3.94952	4.03177	3.63296
Sample 12	5.96197	2.935	2.72409	3.2066
Sample 13	4.38356	3.79792	2.81861	3.53506
Sample 14	2.96339	3.96644	2.64941	2.15114
Sample 15	5.25577	3.07426	4.52647	1.83493
Sample 16	3.96915	3.24582	4.34706	3.31992
Sample 17	3.92197	3.32159	3.35547	3.80015
Sample 18	4.85171	2.49886	4.33896	1.95705
Sample 19	3.79351	4.73169		2.24634
Sample 20	2.90608	2.52124		1.66712
Sample 21		4.02021		3.28877
Sample 22		3.38338		5.57896
Sample 23		2.44142
Sample 24		3.12232
