# Supplementary material for: Phenotypic plasticity as a mechanism of cave colonization and adaptation
Source: eLife. 2020 Apr 21;9:e51830. doi: 10.7554/eLife.51830 (PMC7173965; doi:10.7554/eLife.51830)
Supplement: Figure 6—source data 1. [file elife-51830-fig6-data1.xlsx]

## Sheet: cortisol
Cortisol levels in adult surface fish (SF) and Pachón cavefish (PA) kept in constantly dark( D/D) or normal photoperido (L/D) for 1.5 to 2 years.
Sample	PA D/D	PA D/L	SF D/D	SF D/L			Sample	MO	PA	SF	TI
cortisol/protein, meaurement 1	0.914944	1.04473	1.51314	0.734453			cortisol/protein, meaurement 1	0.0461775	0.37464	0.20015	0.145008
cortisol/protein, meaurement 2	0.847483	1.07502	1.64524	0.864672			cortisol/protein, meaurement 2	0.0596199	0.462386	0.209549	0.126231
cortisol/protein, meaurement 3	0.924196	1.02729	1.46736	0.948376			cortisol/protein, meaurement 3	0.0627305	0.482972	0.216272	0.136418
SUMMARY							SUMMARY
Groups	Count	Sum	Average	Stdev			Groups	Count	Sum	Average	Stdev
PA D/D	3	2.68662	0.895541	0.0418759			MO	3	0.168528	0.056176	0.00879746
PA D/L	3	3.14704	1.04901	0.0241525			PA	3	1.32	0.439999	0.0575307
SF D/D	3	4.62573	1.54191	0.0923628			SF	3	0.625971	0.208657	0.00809811
SF D/L	3	2.5475	0.849167	0.107801			TI	3	0.407657	0.135886	0.00939974
