# Supplementary material for: Phenotypic plasticity as a mechanism of cave colonization and adaptation
Source: eLife. 2020 Apr 21;9:e51830. doi: 10.7554/eLife.51830 (PMC7173965; doi:10.7554/eLife.51830)
Supplement: Figure 7—source data 1. [file elife-51830-fig7-data1.xlsx]

## Sheet: triglyceride
Mean triglyceride levels in Astyanax mexicanus surface fish (SF) and Pachón cavefish (PA) raised in complete darkness (D/D) or a normal photoperiod (L/D) for approximately 1 year since < 24 hpf.
Sample	PA D/D	PA D/L	SF D/D	SF D/L
triglyceride/protein, meaurement 1	39.2436	37.513	30.2992	6.03521
triglyceride/protein, meaurement 2	40.7215	38.763	30.4183	6.61841
triglyceride/protein, meaurement 3	39.9825	37.1067	30.8469	6.10811
SUMMARY
Groups	Count	Sum	Average	StDev
PA D/D	3	119.948	39.9825	0.738948
PA D/L	3	113.383	37.7942	0.86324
SF D/D	3	91.5644	30.5215	0.288066
SF D/L	3	18.7617	6.25391	0.317765
