# Supplementary material for: Phenotypic plasticity as a mechanism of cave colonization and adaptation
Source: eLife. 2020 Apr 21;9:e51830. doi: 10.7554/eLife.51830 (PMC7173965; doi:10.7554/eLife.51830)
Supplement: Figure 8—source data 1. [file elife-51830-fig8-data1.xlsx]

## Sheet: hormones
Thyroid stimulating hormone (TSH) levels normalized by protein concentration in adult surface fish (SF) and Pachón cavefish (PA) kept in complete darkness (D/D) or a normal photoperiod (L/D) for 1.5 to 2 years, as well as in SF and 3 different CF populations: Pachón (PA), Tinaja (TI) and Molino (MO) caves.
THYROID STYMULATING HORMONE
Sample	PA D/D	PA D/L	SF D/D	SF D/L			Sample	MO	PA	SF	TI
TSH/protein, meaurement 1	3.51429	3.30017	2.11152	2.46309			TSH/protein, meaurement 1	2.97983	3.51172	2.74788	3.33446
TSH/protein, meaurement 2	3.55451	3.40126	2.27349	2.5293			TSH/protein, meaurement 2	3.17739	3.94562	2.69696	3.40236
TSH/protein, meaurement 3	3.28597		2.24637	2.5293			TSH/protein, meaurement 3	3.11587	4.15136	2.48174	2.86965
SUMMARY							SUMMARY
Groups	Count	Sum	Average	StDev			Groups	Count	Sum	Average	StDev
PA D/D	3	10.3548	3.45159	0.144832			MO	3	9.27309	3.09103	0.101091
PA D/L	2	6.70143	3.35071	0.0714765			PA	3	11.6087	3.86957	0.326531
SF D/D	3	6.63138	2.21046	0.0867533			SF	3	7.92657	2.64219	0.14127
SF D/L	3	7.52168	2.50723	0.0382254			TI	3	9.60647	3.20216	0.289956
