# Supplementary material for: Phenotypic plasticity as a mechanism of cave colonization and adaptation
Source: eLife. 2020 Apr 21;9:e51830. doi: 10.7554/eLife.51830 (PMC7173965; doi:10.7554/eLife.51830)
Supplement: Figure 9—source data 1. [file elife-51830-fig9-data1.xlsx]

## Sheet: hormones
Growth hormone (GH) levels normalized by protein concentration in adult surface fish (SF) and Pachón cavefish (PA) kept in complete darkness (D/D) or a normal photoperiod (L/D) for 1.5 to 2 years, as well as in SF and 3 different CF populations: Pachón (PA), Tinaja (TI) and Molino (MO) caves.
GROWTH HORMONE
Sample	PA D/D	PA D/L	SF D/D	SF D/L			Sample	MO	PA	SF	TI
GH/protein, meaurement 1	0.461046	0.414735	0.38129	0.22861			GH/protein, meaurement 1	0.424599	0.469739	0.322468	0.322468
GH/protein, meaurement 2	0.4495	0.426583	0.383406	0.215633			GH/protein, meaurement 2	0.406639	0.461931	0.31952	0.31952
GH/protein, meaurement 3	0.451411	0.425091	0.388514	0.216104			GH/protein, meaurement 3	0.403352	0.452212	0.450219	0.450219
SUMMARY							SUMMARY
Groups	Count	Sum	Average	Variance			Groups	Count	Sum	Average	Variance
PA D/D	3	1.36196	0.453986	3.82975e-05			MO	3	1.23459	0.41153	0.000130799
PA D/L	3	1.26641	0.422136	4.16404e-05			PA	3	1.38388	0.461294	7.71054e-05
SF D/D	3	1.15321	0.384403	1.37953e-05			SF	3	1.09221	0.364069	0.0055685
SF D/L	3	0.660346	0.220115	5.41697e-05			TI	3	1.1873	0.395766	1.1237e-05
