# Supplementary material for: Phenotypic plasticity as a mechanism of cave colonization and adaptation
Source: eLife. 2020 Apr 21;9:e51830. doi: 10.7554/eLife.51830 (PMC7173965; doi:10.7554/eLife.51830)
Supplement: Figure 10—source data 1. [file elife-51830-fig10-data1.xlsx]

## Sheet: 5-HT
Serotonin levels normalized by protein concentration in brains and bodies of adult and 7,5 dpf surface fish (SF) and Pachón cavefish (PA) kept in complete darkness (D/D) or a normal photoperiod (L/D), as well as in SF and 3 different CF populations: Pachón (PA), Tinaja (TI) and Molino (MO) caves.
Adult brains												Adult bodies												7dpf larvae										Adult brains
	DAY				NIGHT								DAY				NIGHT
	SF D/L	SF D/D	PA D/L	PA D/D	SF D/L	SF D/D	PA D/L	PA D/D					SF D/L	SF D/D	PA D/L	PA D/D	SF D/L	SF D/D	PA D/L	PA D/D					PA D/D	PA D/L	SF D/D	SF D/L						Sample	MO	PA	SF	TI
sample 1	24.716	22.7596	8.05099	5.74087	15.6324	7.34188	7.58406	6.41423				sample 1	477.463	252.774	252.833	112.14	1244.05	737.783	396.24	157.622				sample 1	2.39675	3.0769	1.16264	1.45002						sample 1	7.08387	5.99747	20.7099	7.61499
sample 2	15.7087	9.48261	9.91601	7.10133	15.4665	8.7402	7.10144	8.09567				sample 2	1572.71	1042.41	382.886	337.373	1387.81	300.492	208.53	269.25				sample 2	1.76459	2.1031	0.952523	1.48215						sample 2	9.5887	8.73761	17.5778	7.30103
sample 3	22.2964	13.4421	7.71851	8.20114	12.1842	8.25843	6.19669	8.02153				sample 3	426.462	286.092	398.914	184.085	1674.59	476.971	129.402	173.886				sample 3	1.82118	1.98371	1.05697	1.12392						sample 3	8.65755	6.79877	13.108	8.69385
sample 4	16.9553	12.743	8.11679	10.1848	12.0062	5.63119	8.55048	8.62055				sample 4	469.235	636	186.029	450.321	808.65	1474.41	373.479	288.171				sample 4	2.02867	1.94406	1.07137	1.05607						sample 4	7.00283	15.1027	20.8856	8.63138
sample 5	18.7655	13.5469	10.6067	4.33876	12.6708	8.70191						sample 5	1264.98	454.61	234.69	91.2706	1617	890.571						sample 5		1.93044	0.962608	0.991129						sample 5	7.21853	9.75076	16.5223	8.06111
sample 6	18.1989	19.8417	7.89814	8.85683	13.086	8.58934						sample 6	1007.54	1002.51	146.623	742	1344.75	458.632						sample 6				0.92737						sample 6		6.83875	17.4152
sample 7	12.7706	14.2766	7.04666	6.95117	8.3998							sample 7	1560.07	320.217	0	481.667	1551.08	800.78																sample 7			15.4365
sample 8	11.2896	8.6249	9.73735	9.73084								sample 8	1218.71	632.207	236.192	176.598																		sample 8			17.5864
sample 9	15.3494	9.84284	8.73424	8.85166								sample 9	1492.17	720.336		353.116
sample 10		9.42996	8.32323	8.27215								sample 10	1839.92			104.571								SUMMARY
																								Groups	Count	Sum	Average	STDEV						SUMMARY
																								PA D/D	4	8.01118	2.0028	0.286121						Groups	Count	Sum	Average	StDev
SUMMARY												SUMMARY												PA D/L	5	11.0382	2.20764	0.490661						MO	5	39.5515	7.9103	1.15763
Groups	Count	Sum	Average	STDEV								Groups	Count	Sum	Average	STDEV								SF D/D	5	5.20611	1.04122	0.0865262						PA	6	53.226	8.87101	3.3558
SF D/L day	9	156.05	17.3389	4.27198								SF D/L day	10	11329.3	1132.93	517.955								SF D/L	6	7.03065	1.17178	0.237402						SF	8	139.242	17.4052	2.56954
SF D/D day	10	133.99	13.399	4.67716								SF D/D day	9	5347.15	594.128	294.271																		TI	5	40.3024	8.06047	0.612843
PA D/L day	10	86.1486	8.61486	1.12359								PA D/L day	8	1838.17	229.771	127.768
PA D/D day	10	78.2296	7.82296	1.8088								PA D/D day	10	3033.14	303.314	211.026
SF D/L night	7	89.446	12.778	2.43583								SF D/L night	7	9627.92	1375.42	293.911
SF D/D night	6	47.2629	7.87716	1.21725								SF D/D night	7	5139.64	734.235	388.806
PA D/L night	4	29.4327	7.35817	0.981086								PA D/L night	4	1107.65	276.913	129.099
PA D/D night	4	31.152	7.78799	0.953863								PA D/D night	4	888.928	222.232	66.0062
