# Supplementary material for: Phenotypic plasticity as a mechanism of cave colonization and adaptation
Source: eLife. 2020 Apr 21;9:e51830. doi: 10.7554/eLife.51830 (PMC7173965; doi:10.7554/eLife.51830)
Supplement: Figure 11—source data 1. [file elife-51830-fig11-data1.xlsx]

## Sheet: Sheet1
Percentage survival of starvation in F1 offspring of surface fish kept in normal light/dark photoperiod (SF) and surface fish raised in total darkness for 2 years (dSF) which were placed in either complete darkness D/D or normal light/dark photoperiod (L/D).
	DAY	SF L/D	SF D/D	dSF L/D	dSF D/D
	7	100	100	100	100
	8	100	100	100	100
	9	100	100	100	100
	10	95.8333	95.8333	95.8333	95.8333
	11	95.8333	95.8333	87.5	95.8333
	12	66.6667	91.6667	79.1667	91.6667
	13	50	87.5	54.1667	91.6667
	14	20.8333	83.3333	16.6667	91.6667
	15	0	70.8333	4.16667	91.6667
	16	0	66.6667	0	87.5
	17	0	58.3333	0	79.1667
	18	0	41.6667	0	58.3333
	19	0	12.5	0	37.5
	20	0	0	0	4.16667
	21	0	0	0	4.16667
