# Supplementary material for: Phenotypic plasticity as a mechanism of cave colonization and adaptation
Source: eLife. 2020 Apr 21;9:e51830. doi: 10.7554/eLife.51830 (PMC7173965; doi:10.7554/eLife.51830)
Supplement: Figure 12—source data 1. [file elife-51830-fig12-data1.xlsx]

## Sheet: Sheet1
oxygen consumption of 11 dpf F1 offspring surface fish kept in the normal light/dark photoperiod (SF) and surface fish kept in total darkness for 2 years (dSF). Each group of offspring was exposed to total darkness D/D or the normal light/dark photoperiod L/D conditions within first 24 hpf.
	Sample	SF L/D	SF D/D	dSF D/D	dSF L/D
	Sample 1	1.22338	1.67969	1.06113	0.882679
	Sample 2	1.22587	1.8899	0.958093	1.48299
	Sample 3	1.08897	1.8748	0.958021	1.8819
	Sample 4	1.24172	1.10391	1.12573	2.06312
	Sample 5	0.926926	1.11006	0.85292	1.97474
	Sample 6	1.44277	1.26126	1.34335	1.20276
	Sample 7	1.42912	1.45319	1.13885	1.507
	Sample 8	1.5982	1.69641	0.814273	0.786973
	Sample 9	1.61733	0.839523	1.23563	1.11605
	Sample 10	1.76596	1.03936	1.00156	1.7711
	Sample 11		1.07139	1.03128	1.64121
	Sample 12		0.826363	0.993404	1.82988
	Sample 13			1.2229	1.70528
	Sample 14			1.36965
	Sample 15			1.63943
	avg	1.35603	1.32049	1.11642	1.52659
	stdev	0.260532	0.385027	0.217915	0.413232
		Tukey HSD results
		treatments	Tukey HSD	Tukey HSD	Tukey HSD
		pair	Q statistic	p-value	inferfence
		A vs B	0.3576	0.8999947	insignificant
		A vs C	25289	0.2921884	insignificant
		A vs D	17472	0.5963339	insignificant
		B vs C	22703	0.3868309	insignificant
		B vs D	22183	0.4076182	insignificant
		C vs D	46640	0.0098361	** p<0.01
